# Supplementary figures and images for: Hardware implementation of a true random number generator integrating a hexagonal boron nitride memristor with a commercial microcontroller
Source: Royal Society of Chemistry journal article supplement (doi:10.1039/d2nr06222d), 2022-12-29

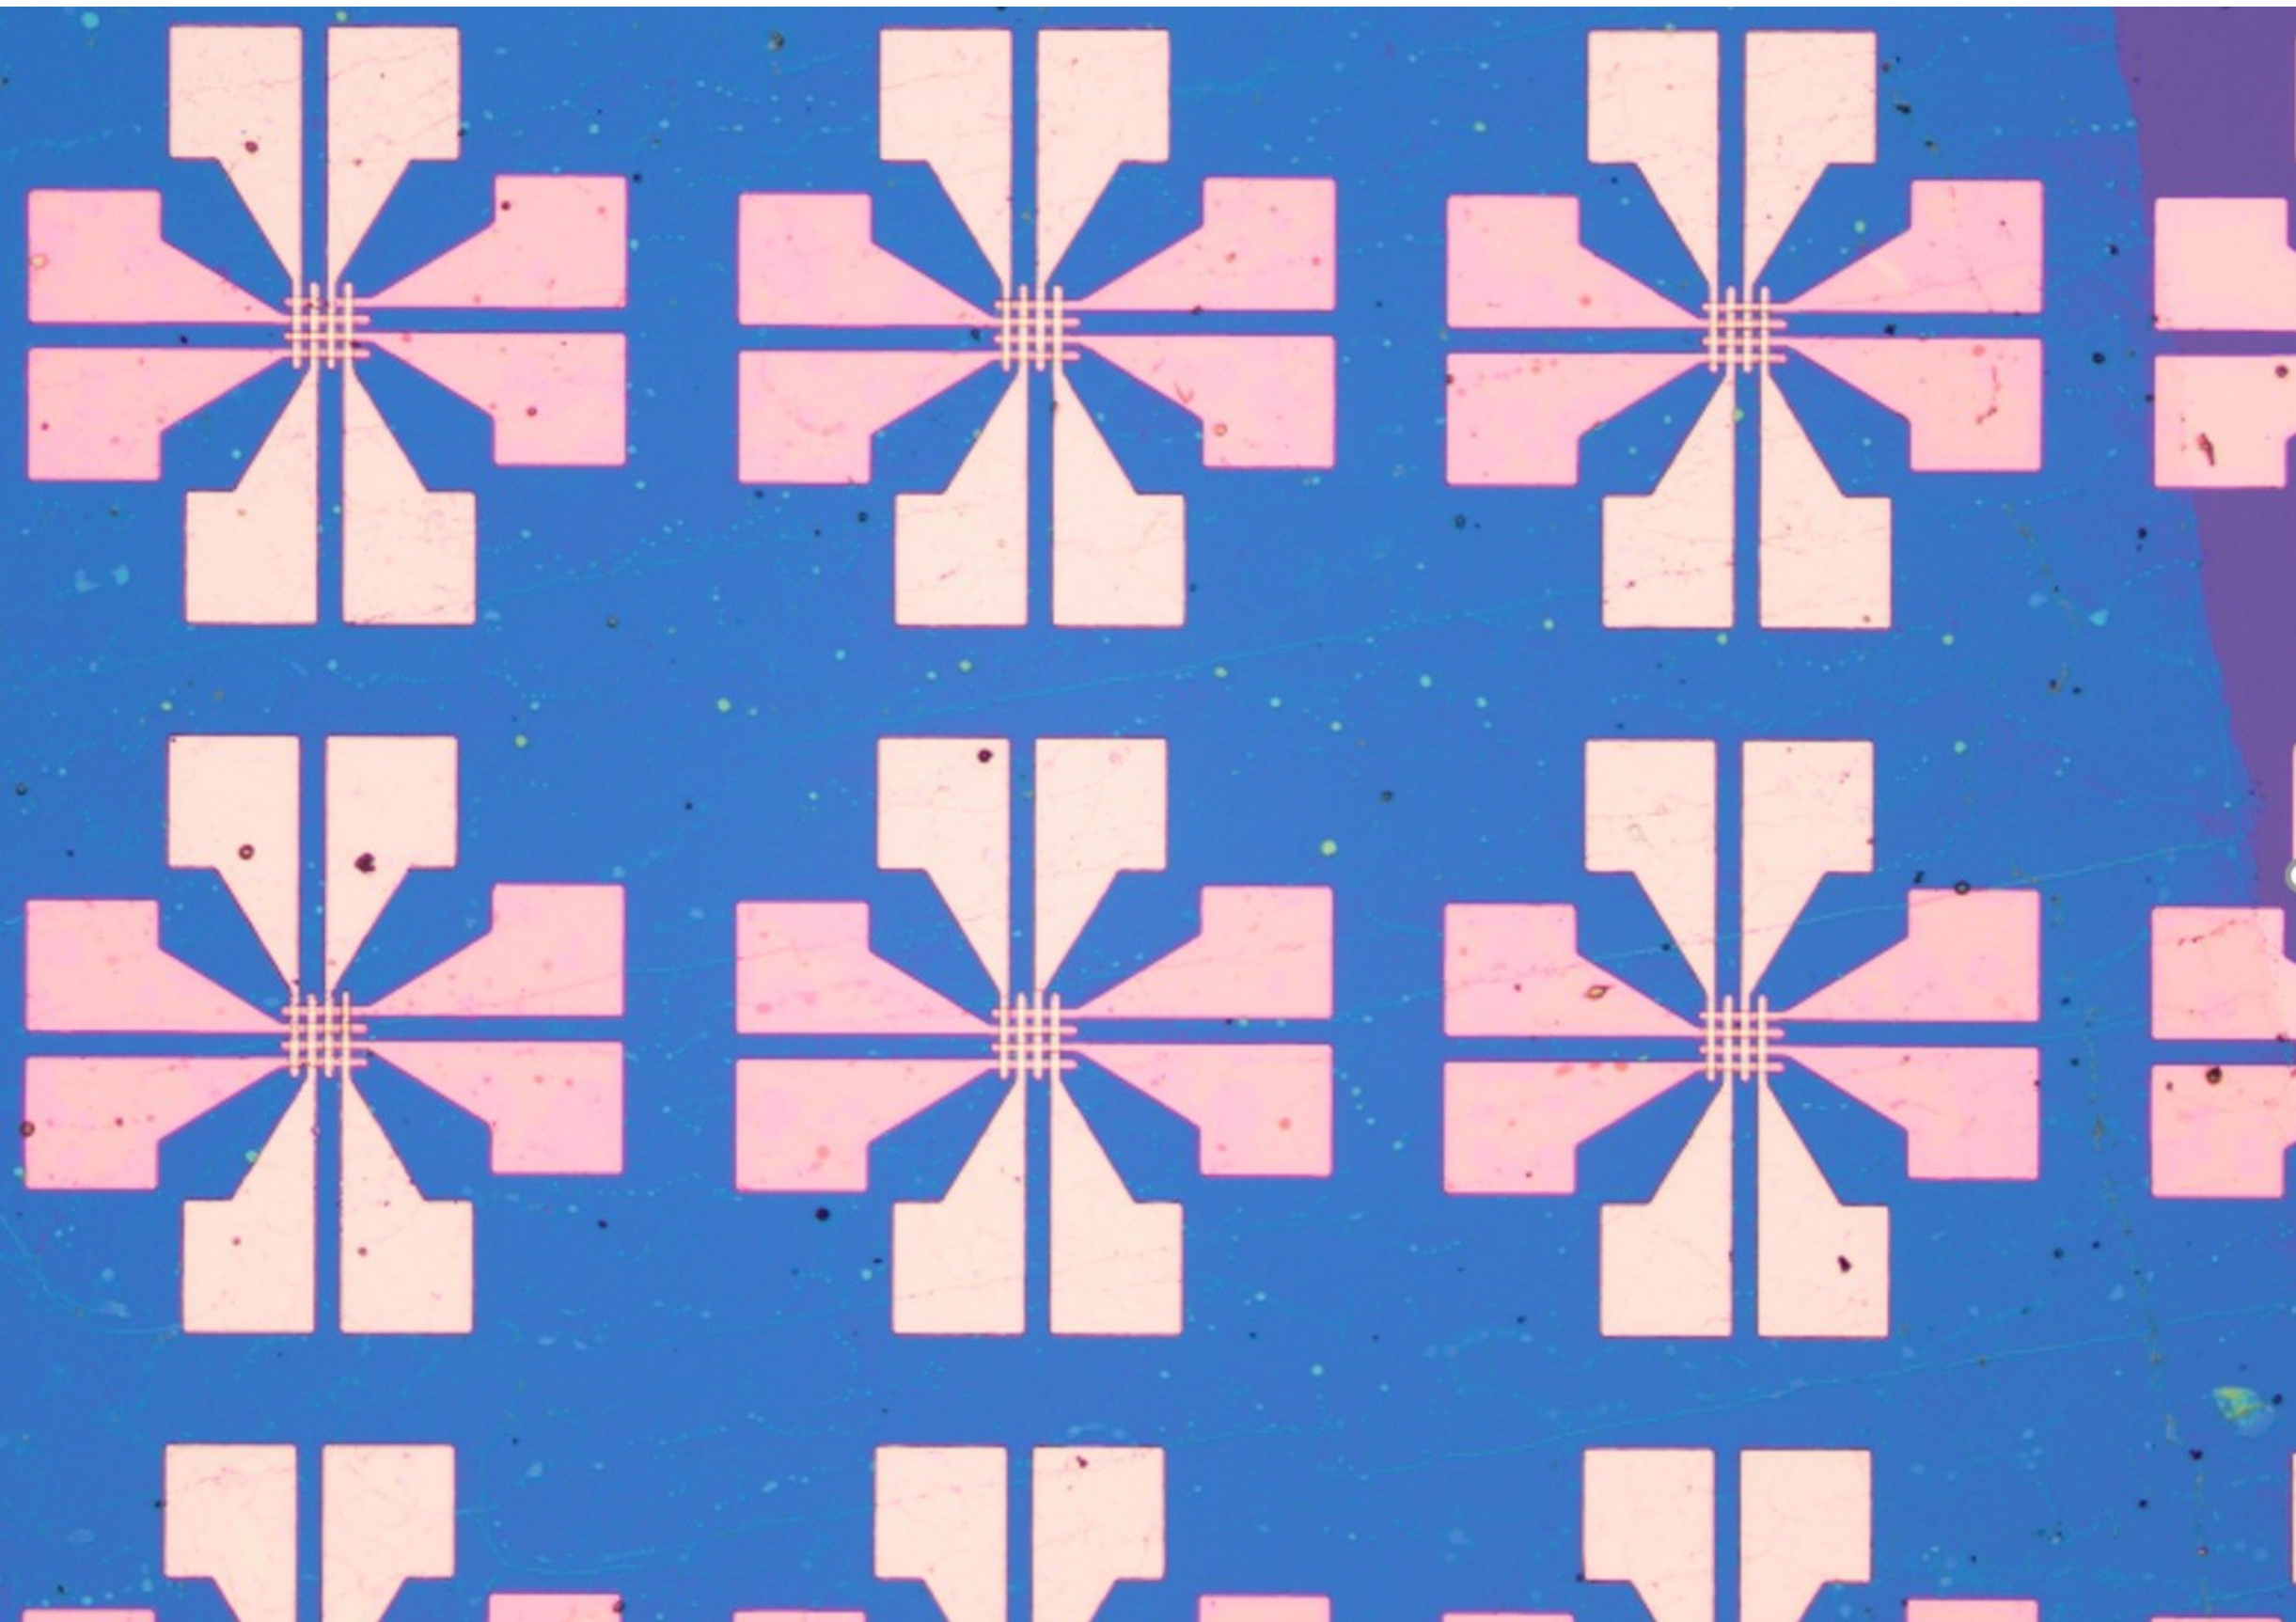

Supplement: d2nr06222d3.pdf [file d2nr06222d3.pdf]

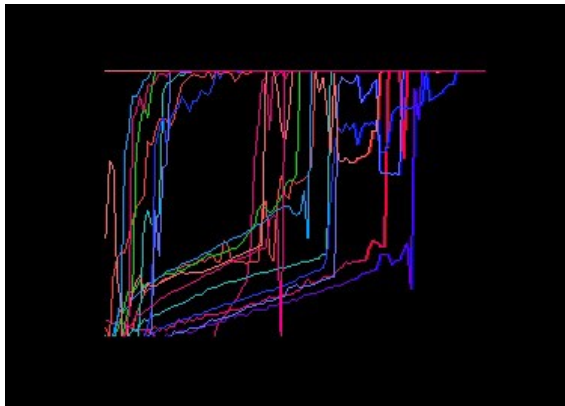

Supplement: d2nr06222d4.pdf [file d2nr06222d4.pdf]

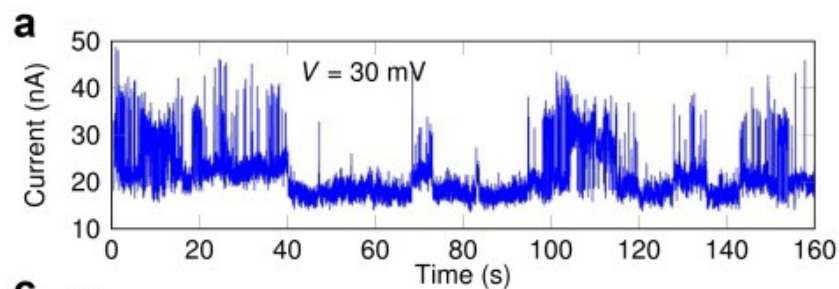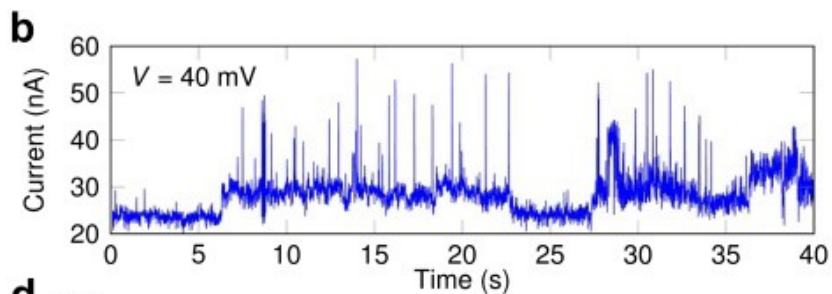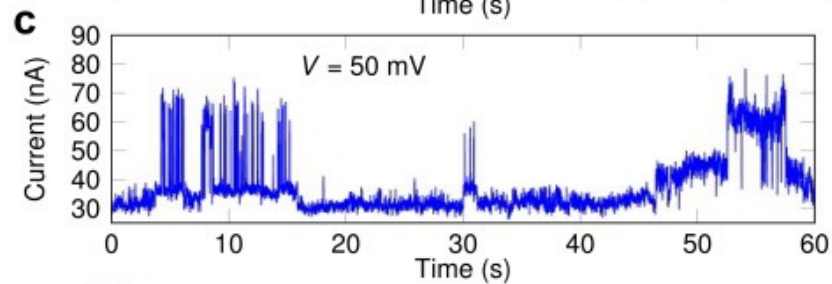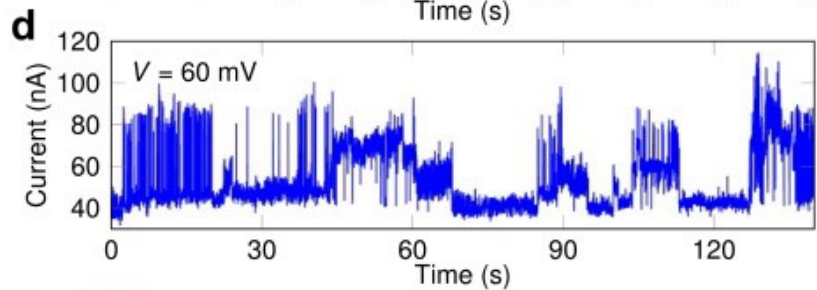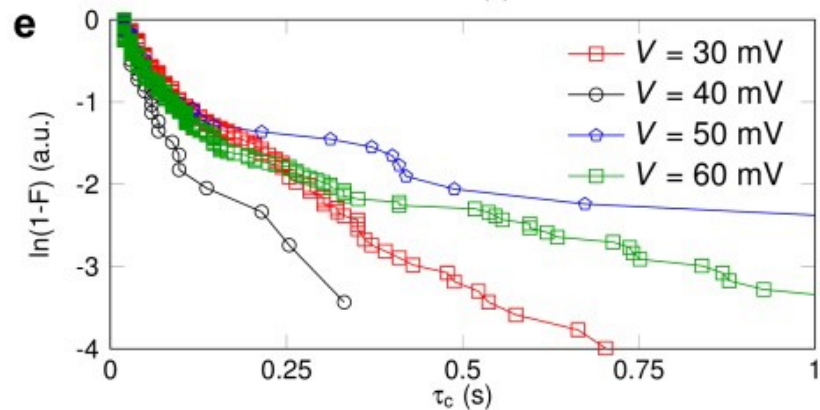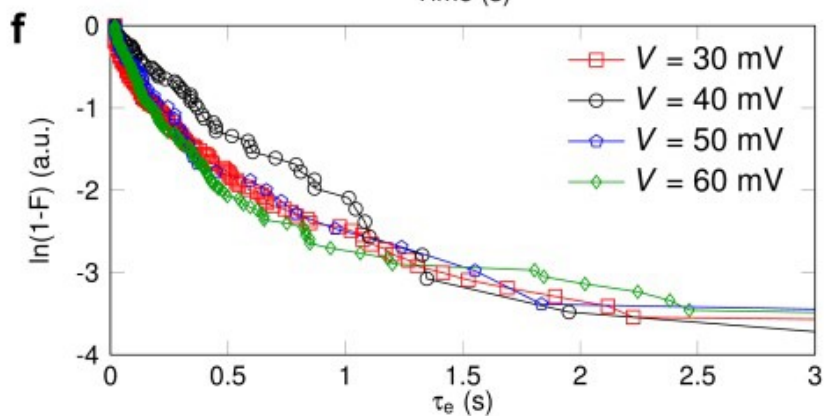

Supplement: d2nr06222d5.pdf [file d2nr06222d5.pdf]

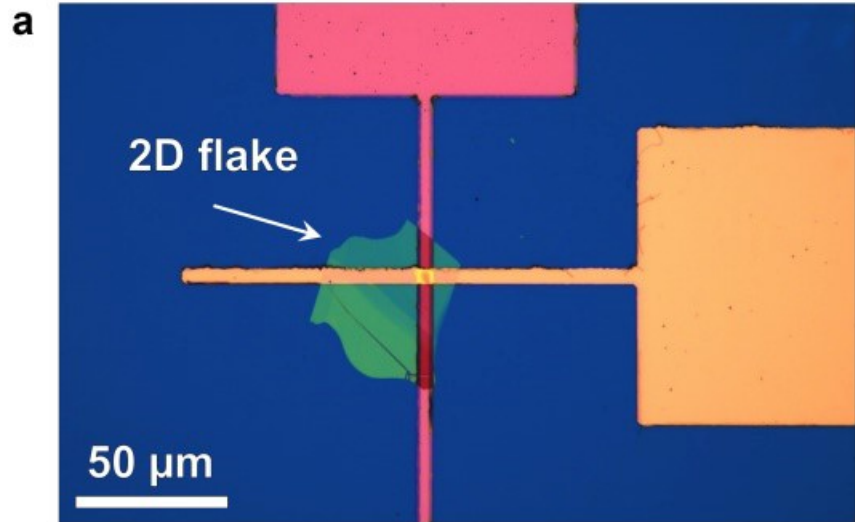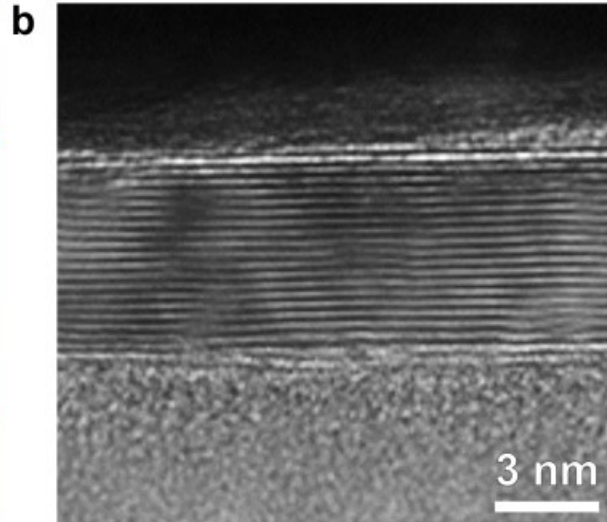

Supplement: d2nr06222d6.pdf [file d2nr06222d6.pdf]

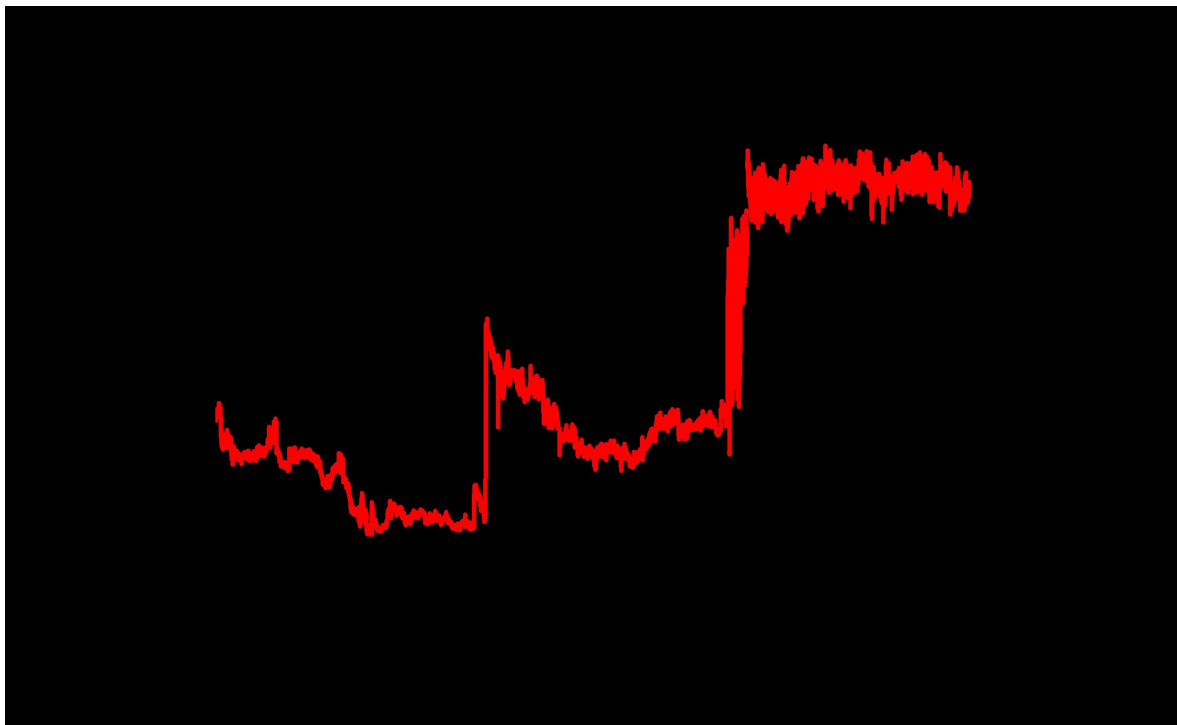

Supplement: d2nr06222d7.pdf [file d2nr06222d7.pdf]

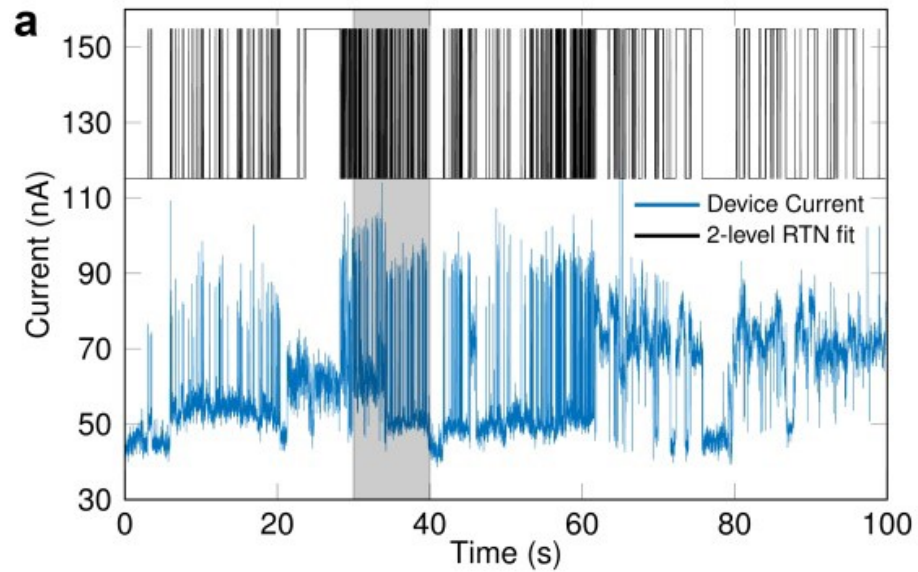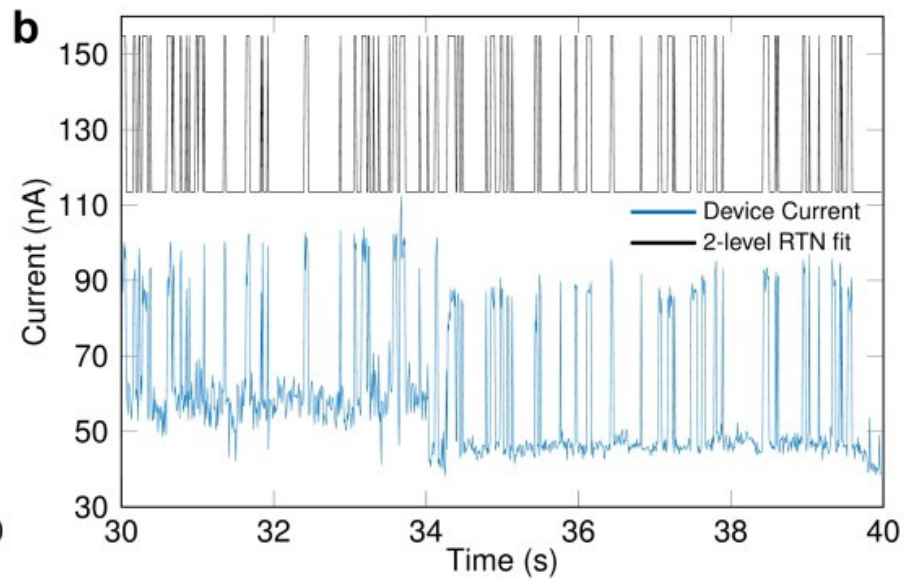

Supplement: d2nr06222d8.pdf [file d2nr06222d8.pdf]

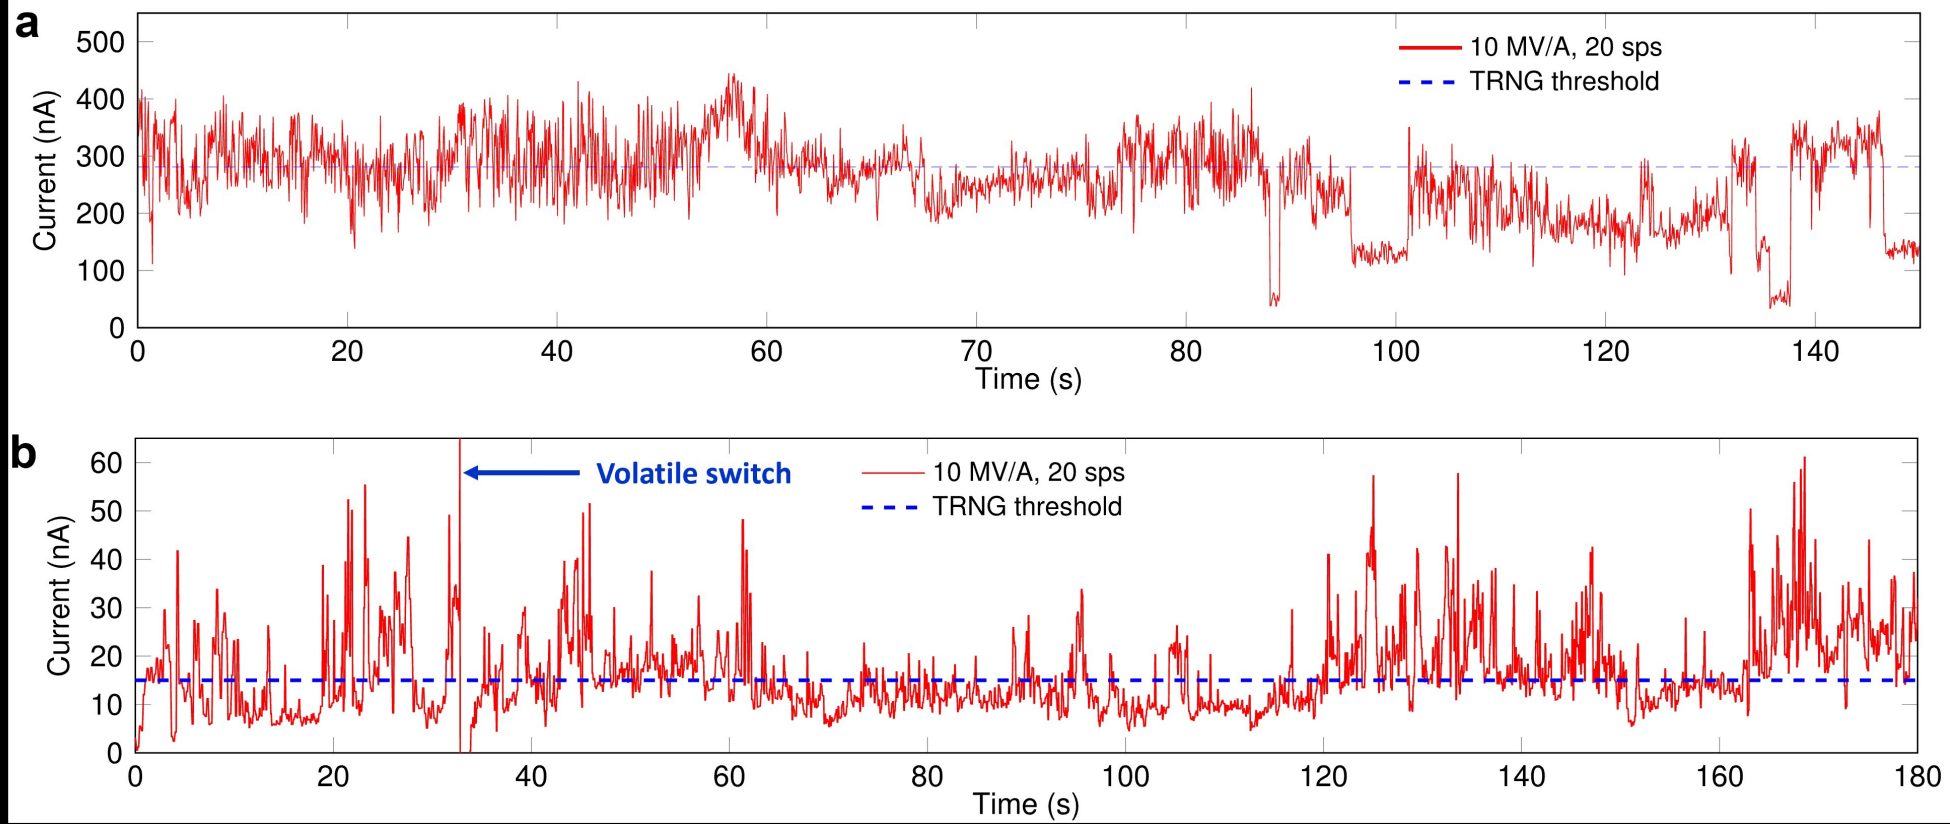

Supplement: d2nr06222d9.pdf [file d2nr06222d9.pdf]
